# Supplementary material for: Plasticity of the Immune System in Children Following Treatment Interruption in HIV-1 Infection
Source: PubMed Central journal article supplement (PMC8406805; doi:10.3389/fimmu.2021.643189), 2021-07-29
Supplement: DataSheet_1.pdf [file DataSheet_1.pdf]

Supplementary

Table 1S. Example of data input for the mathematical model to estimate thymic output

|            | TRECs/ CD4+, CD45RA+, CD45RO- T cell | Total number of naive CD4+, CD45RA+, CD31+ T cell population* | Ki67 of total CD4+, CD45RA+, CD31+ T cells as a fraction | Weight (kg) | c*  | Δ**  |
|------------|--------------------------------------|---------------------------------------------------------------|----------------------------------------------------------|-------------|-----|------|
| <b>CT</b>  |                                      |                                                               |                                                          |             |     |      |
| Week 0     | 0,0145                               | 1,478*10 <sup>11</sup>                                        | 0,0188                                                   | 55          | 0,6 | 0,52 |
| Week 48    | 0,0185                               | 1,510*10 <sup>11</sup>                                        | 0,019                                                    | 61          | 0,6 | 0,52 |
| Week 150   | 0,0166                               | 1,475*10 <sup>11</sup>                                        | 0,0131                                                   | 77          | 0,6 | 0,52 |
| <b>PTI</b> |                                      |                                                               |                                                          |             |     |      |
| Week 0     | 0,0298                               | 1,345*10 <sup>11</sup>                                        | 0,0078                                                   | 40          | 0,6 | 0,52 |
| Week 12    | 0,0574                               | 8,228*10 <sup>10</sup>                                        | 0,0222                                                   | 43          | 0,6 | 0,52 |
| Week 48    | 0,0264                               | 8,444*10 <sup>10</sup>                                        | 0,0188                                                   | 47          | 0,6 | 0,52 |
| Week 150   | 0,0303                               | 2,045*10 <sup>11</sup>                                        | 0,0086                                                   | 70          | 0,6 | 0,52 |

\* Estimated as previously described, referring to the linear relationship between blood volume and body weight (15,16)

\*\*Parameter values c and Δ were obtained as described previously (6).

Fig. 1S

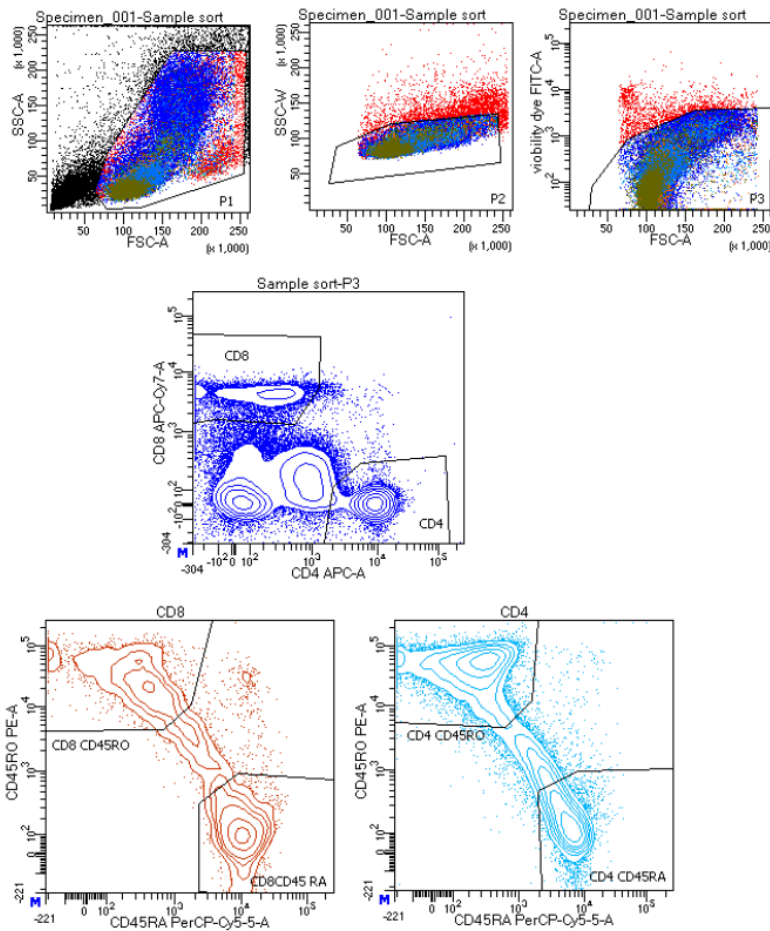

**Fig. 1S Gating strategy for FACS sorting.** Thawed PBMCs were FACS sorted to isolate and separate naïve CD4<sup>+</sup>, CD45RA<sup>+</sup>, CD45RO<sup>-</sup> T cells and memory CD8<sup>+</sup>, CD45RO<sup>+</sup>, CD45RA<sup>-</sup> T cell subsets for downstream high throughput sequencing with T cell specific primers.

Fig. 2S

a. PTI

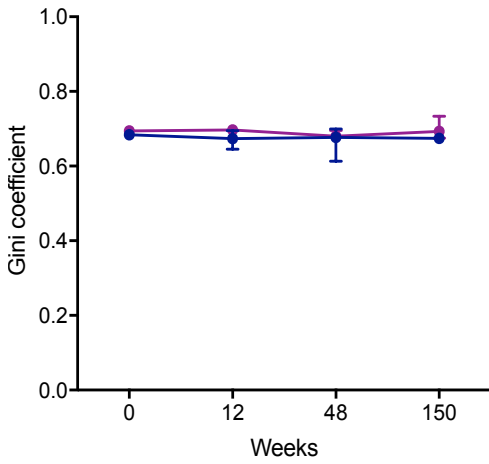

b. CT

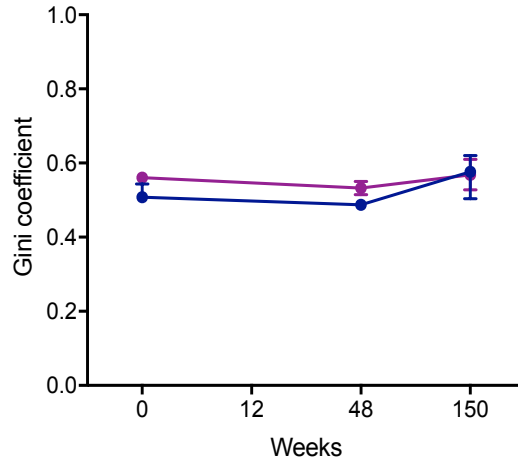

● Alpha chain  
● Beta chain

c

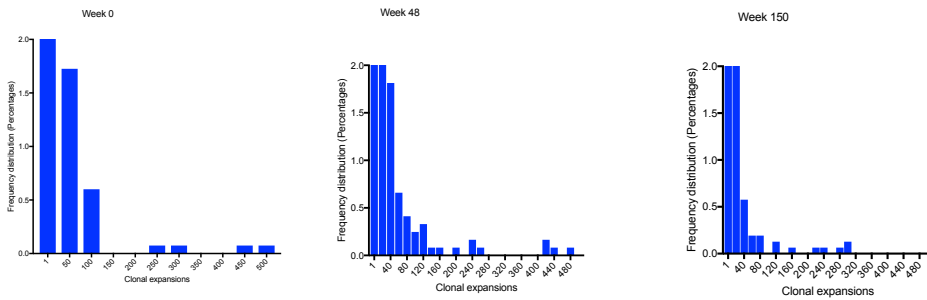

d

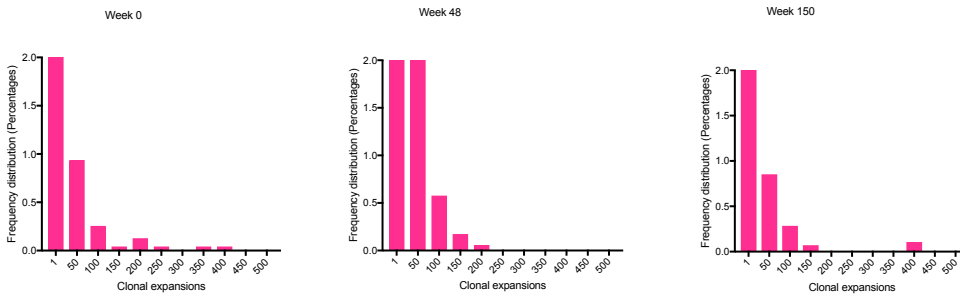

e

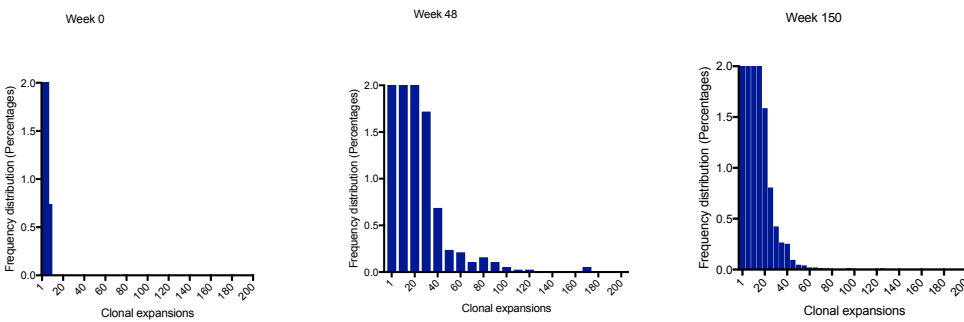

f

The beta chain week 0 did not have enough reads to be included in the analysis

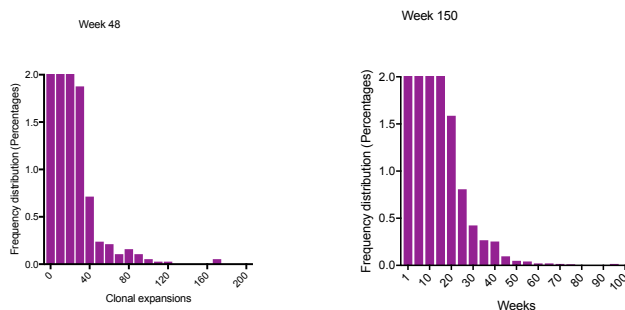

**Figure 2S. Changes in TCR abundance distribution in memory CD8<sup>+</sup> T cells during ART treatment interruption.** *a-b* | The degree of clonal expansion in the TCR repertoire measured using the Gini coefficient in TCR alpha (blue) and TCR beta sequences (purple) in the PTI (a) and CT (b) group. *c-f* | TCR sequence abundance distribution in representative individuals. *c* and *e* TCR alpha; *d* and *f* TCR beta. *c* and *d* PTI group; *e* and *f* CT group.

Fig. 3S

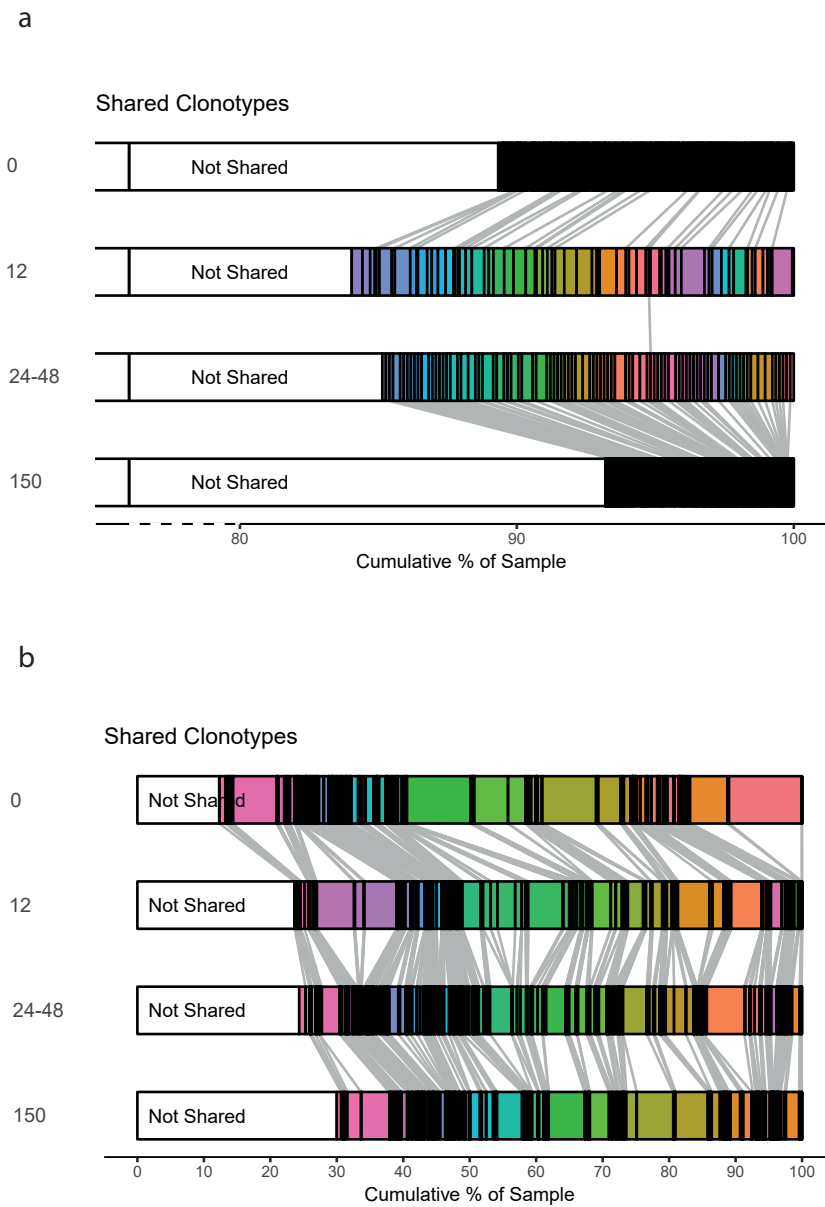

**Fig. 3S. Repertoire dynamics and sequence sharing associated with ART interruption.**

a) Shared CDR3s between weeks 0, 12, 24-48, and 150 originated from the naïve CD4+ T cell population shown as connecting grey lines. b) Shared CDR3s originated from the memory CD8+. The white horizontal bars represent the cumulative percentages of unique CDR3s and constitute the majority of the naïve TCR population. All CDR3s have been colour-coded alphabetically and the narrow coloured lines (black) represent very low frequency CDR3s. The same colour represents the same CDR3. No connecting grey lines between similar colours means that the sequences are conserved within the individual at least two time points, but are not shared between that pair of time points.

Table 2S

| Table Analyzed           | Paired t test data   | Nodes / total TCR clustered |                 |                  |          |
|--------------------------|----------------------|-----------------------------|-----------------|------------------|----------|
| Two-way ANOVA            | Ordinary             |                             |                 |                  |          |
| Alpha                    | 0.05                 |                             |                 |                  |          |
| Source of Variation      | % of total variation | P value                     | P value summary | Significant?     |          |
| Patients                 | 61.78                | 0.1615                      | ns              | No               |          |
| Time                     | 20.95                | 0.1525                      | ns              | No               |          |
| ANOVA table              | SS                   | DF                          | MS              | F (DFn, DFd)     | P value  |
| Patients                 | 0.0006083            | 3                           | 0.0002028       | F (3, 3) = 3.577 | P=0.1615 |
| Time                     | 0.0002063            | 1                           | 0.0002063       | F (1, 3) = 3.638 | P=0.1525 |
| Residual                 | 0.0001701            | 3                           | 5.669e-005      |                  |          |
| Number of missing values | 0                    |                             |                 |                  |          |
